# Supplementary material for: Clique Relaxations in Social Network Analysis: The Maximum k-Plex Problem
Source: Atypon-hosted journal article supplement (doi:10.1287/opre.1100.0851), 2011-02-01
Supplement: opre.1100.0851-sm-ec.pdf [file opre.1100.0851-sm-ec.pdf]

**e - c o m p a n i o n**

ONLY AVAILABLE IN ELECTRONIC FORM

Electronic Companion—“Clique Relaxations in Social Network Analysis:  
The Maximum  $k$ -Plex Problem” by Balabhaskar Balasundaram,  
Sergiy Butenko, and Illya V. Hicks, *Operations Research*,  
doi 10.1287/opre.1100.0851.

---

**This page is intentionally blank. Proper e-companion title page, with INFORMS branding and exact metadata of the main paper, will be produced by the INFORMS office when the issue is being assembled.**

## Appendices

### Appendix A: Proofs

**THEOREM EC.2.**  $k$ -PLEX is NP-complete for any fixed positive integer  $k$ .

**PROOF.** Since the  $k$ -plex definition is *nontrivial, interesting* and *hereditary on induced subgraphs* the maximum  $k$ -plex problem is NP-hard by the result of Yannakakis (1979). Here, we provide a more direct proof by reducing CLIQUE (Garey and Johnson 1979), a well-known NP-complete problem, to  $k$ -PLEX. Given an instance  $\langle G = (V, E), c \rangle$  of CLIQUE, we construct an instance  $\langle G' = (V', E'), c' \rangle$  in polynomial time such that  $G$  has a clique of size  $c$  if and only if  $G'$  has a  $k$ -plex of size  $c'$ . To construct  $G'$ , we expand  $G$  by adding  $k - 1$  copies of the complete graph of order  $n = |V|$ . Denote the vertex set of the  $r^{\text{th}}$  such copy by  $V_r$ ,  $r = 1, \dots, k - 1$ , where  $V_r = \{1_r, \dots, n_r\}$ , and let  $R = \bigcup_{r=1}^{k-1} V_r$ . Put  $V' = V \cup R$  and  $E' = E \cup \hat{E} \cup \tilde{E}$ , where  $\hat{E} = \{(i, j_r) : i \in V, j_r \in V_r, i \neq j, r = 1, \dots, k - 1\}$  and  $\tilde{E} = \{(i_p, j_r) : i_p \in V_p, j_r \in V_r, i \neq j, p, r = 1, \dots, k - 1\}$ . The set  $\hat{E}$  represents the edges between  $V$  and  $R$ , where every vertex  $u \in V$  is connected to every vertex in every complete graph except its copies, *i.e.*,  $u$  is adjacent to every vertex in  $R \setminus \{u_1, \dots, u_{k-1}\}$ . The set  $\tilde{E}$  includes the cross edges between distinct  $V_p$  and  $V_r$ , as well as all possible edges between vertices in  $V_p$ ,  $p = 1, \dots, k - 1$ . In other words, every vertex  $u_p \in V_p$ ,  $p = 1, \dots, k - 1$  is adjacent to all the vertices in  $V_r \setminus \{u_r\}$ ,  $r = 1, \dots, k - 1$ . Putting  $c' = c + (k - 1)n$  completes the reduction. Note that the instance  $\langle G' = (V', E'), c' \rangle$  can be constructed in polynomial time.

We now show that if there exists a clique of size  $c$  in  $G$  then  $G'$  has a  $k$ -plex of size  $c'$ . Let  $C \subseteq V$  induce a clique of size  $c = |C|$  in  $G$ . We claim that the set  $S = C \cup R$ , where  $|S| = c + n(k - 1) = c'$ , is a  $k$ -plex. For any  $u \in C$ , there exist  $c - 1$  neighbors inside  $C$ , and  $(n - 1)(k - 1)$  neighbors in  $R$ . Thus, for  $u \in C$ ,  $\deg_{G[S]}(u) = c - 1 + (n - 1)(k - 1) = c' - k$ . For any  $v_r \in R$ , there exist  $(n - 1)(k - 1)$  neighbors in  $R$  and  $c$  neighbors in  $C$  if  $v \notin C$ , and  $c - 1$  neighbors in  $C$  if  $v \in C$ . Again, for  $v_r \in R$ ,  $\deg_{G[S]}(v_r) \geq c - 1 + (n - 1)(k - 1) = c' - k$ . Hence,  $S$  induces a  $k$ -plex of size  $c'$ .

We now establish the other direction stating that if there exists a  $k$ -plex of size  $c'$  in  $G'$  then  $G$  has a clique of size  $c$ . Let  $S$  be a  $k$ -plex of size  $c' = c + n(k - 1)$ . Let  $P = R \setminus S$  denote the set of vertices from  $R$  not included in the  $k$ -plex and let  $|P| = p$ . Then, the  $c'$  vertices in  $S$  consist of  $n(k - 1) - p$  vertices in  $S \cap R$  and  $c + p$  vertices in  $S \cap V$ . Without loss of generality, suppose that  $S \cap V = \{1, \dots, c + p\}$  and further assume that for each  $i \in S \cap V$  there exist  $q_i$  copies of  $i$  in  $P$  that are left out of the  $k$ -plex. Since every  $i \in S \cap V$  has  $p - q_i$  neighbors in  $P$ , we know that  $|N(i) \cap (S \cap R)| = (n - 1)(k - 1) - (p - q_i)$ . Since  $S$  is a  $k$ -plex,  $\forall i \in S \cap V : \deg_{G[S]}(i) = |N(i) \cap (S \cap R)| + |N(i) \cap (S \cap V)| \geq c + n(k - 1) - k, \Rightarrow |N(i) \cap (S \cap V)| \geq c + p - 1 - q_i$ . Recall that each  $q_i$  is a non-negative integer counting copies of vertex  $i \in S \cap V$  in  $P$  and note that  $P$  can contain vertices that are not copies of any vertex in  $S \cap V$ . Thus, we have  $\sum_{i=1}^{c+p} q_i \leq p$ . Hence, there can exist at most  $p$  terms,  $q_i$ , in that sum that are strictly greater than 0, meaning that there exist at least  $c$  terms in that sum that are equal to 0. Without loss of generality, suppose that  $q_i = 0$ ,  $i \in \{1, \dots, c\}$ . Now, let  $C = \{1, \dots, c\}$ . We already know that for all  $i \in C \subseteq S \cap V = \{1, \dots, c + p\} : |N(i) \cap (S \cap V)| \geq c + p - 1 - q_i = c + p - 1$ . But  $|S \cap V| = c + p$ , so for all  $i \in C$ ,  $|N(i) \cap (S \cap V)| = c + p - 1$ . Thus, every vertex in  $C \subseteq S \cap V$  is adjacent to every vertex in  $S \cap V$ . Hence, every vertex in  $C$  is adjacent to every other vertex in  $C$  and  $|C| \geq c$ .  $\square$

**THEOREM EC.3.** Let  $P_k(G)$  denote the  $k$ -plex polytope of a given graph  $G = (V, E)$ , where  $k > 1$ . Then, (1)  $\dim(P_k(G)) = n$ ; (2)  $x_i \geq 0$ , and  $x_i \leq 1$  induce facets of  $P_k(G)$  for every  $i \in V$ .

**PROOF.** Let  $e_i$  be the unit vector with  $i^{\text{th}}$  component 1 and the rest 0;  $e_{ij} = e_i + e_j$ . The points  $\mathbf{0}, e_1, e_2, \dots, e_n$  are clearly  $n + 1$  affinely independent points in  $P_k(G) \subset \mathbb{R}^n$ . Hence,  $\dim(P_k(G)) = n$ .

Let  $F = \{x \in P_k(G) : x_i = 0\}$ . Since an empty set or any vertex by itself is a  $k$ -plex, we have  $\mathbf{0}, e_j$  for all  $j \in V \setminus \{i\}$  forming  $n$  affinely independent points in  $F$ . This shows that  $\dim(F) = n - 1$  and it is a facet. Let  $F' = \{x \in P_k(G) : x_i = 1\}$ . We first observe that every vertex and any pair

of vertices form a  $k$ -plex for any  $k$  such that  $1 < k < n$ . Then  $e_i$  and  $e_{ij}$  for all  $j \in V \setminus \{i\}$  form  $n$  affinely independent points in  $F'$ , indicating that  $\dim(F') = n - 1$  and it is a facet.  $\square$

**THEOREM EC.5.** *For a subset  $J \subseteq V$  such that  $|J| \geq 3$ , the inequality  $\sum_{i \in J} x_i \leq 2$ , induces a facet of  $P_2(G)$  if and only if  $J$  is a maximal co-2-plex.*

**PROOF.** Let  $J$  be a maximal co-2-plex. First, recall that any 2 vertices from  $J$  form a 2-plex. Second, for every  $v \in V \setminus J$ , the above two conditions for a maximal co-2-plex imply the existence of two vertices  $u, w \in J$  such that  $\{v, u, w\}$  is a 2-plex. Indeed, if the first case holds, let  $u \in J \cap N(v)$ , then  $N(u) \cap J = \{w\}$  and  $\{v, u, w\}$  is a 2-plex. If the second case holds,  $\{u, w\} \subseteq J \cap N(v)$  and again  $\{v, u, w\}$  is a 2-plex. We use these observations to construct  $n$  affinely independent (a.i.) vectors that lie on the face defined by  $F = \{x \in P_2(G) : \sum_{i \in J} x_i = 2\}$ , so  $F$  is  $(n - 1)$ -dimensional and hence, a facet. W.l.o.g. assume that  $J = \{1, \dots, r\}$  and  $V \setminus J = \{r + 1, \dots, n\}$ , where  $r \geq 3$ . Let  $e_i \in \mathbb{R}^n$  denote the unit vector with  $i$ -th component one and all others zero. The a.i. vectors are constructed as:  $x^v = e_v + e_r$ ,  $\forall v = 1, \dots, r - 1$ ;  $x^r = e_1 + e_2$  (note that  $x^r$  is distinct from  $x^1, \dots, x^{r-1}$  as  $r \geq 3$ );  $x^v = e_v + e_u + e_w$ ,  $\forall v = r + 1, \dots, n$ , where for each  $v \in V \setminus J$ ,  $u, w \in J$  are particular vertices described before. Clearly,  $x^v \in F$  and it is easy to verify that they are a.i.

For the converse, suppose  $\sum_{i \in J} x_i \leq 2$  induces a facet of  $P_2(G)$ . If  $J$  is not a co-2-plex, there exists some  $v \in J$  with 2 neighbors in  $J$  which form a 2-plex. The incidence vector of this 2-plex violates the facet inducing inequality, leading to a contradiction. Hence,  $J$  must be a co-2-plex. If  $J$  is not maximal, then there exists a valid maximal co-2-plex inequality that dominates the given facet inducing inequality. Hence,  $J$  must be a maximal co-2-plex.  $\square$

**THEOREM EC.7.** *Let  $G = (V, E)$  be a cycle on  $n = t(k + 1)$  vertices with  $t \geq 2, k \geq 3$  such that  $k + 1$  is odd. Then the inequality  $\sum_{i \in V} x_i \leq k + 1$  induces a facet of  $P_k(G)$ .*

**PROOF.** Let  $V = \{1, 2, \dots, n\}$  and  $E = \{(i, i + 1 \pmod n) : i \in V\}$ . Suppose there exists a valid inequality  $ax \leq b$  that contains the face induced by the hole inequality, we show that  $a_i = \lambda, i \in V$  and  $b = (k + 1)\lambda$  for some scalar  $\lambda$ . Note that the union of a path on  $k - 1$  vertices ( $k \geq 3$ ) and a path on 2 vertices forms a  $k$ -plex (this includes one path on  $k + 1$  vertices) that satisfies the hole inequality at equality. In the following arguments, we first *fix* a path on  $k - 1$  vertices and consider every 2-vertex path, with two consecutive  $k$ -plexes so constructed, differing by one vertex. That is, if  $S$  is such a  $k$ -plex with  $(v, u)$  as the 2-vertex path, the next  $k$ -plex is constructed as  $T = S \cup \{w\} \setminus \{v\}$  where  $v \in S, w \in V \setminus S, (u, w)$  is the new 2-vertex path, and hence,  $a_v = a_w$ .

*Case I:  $n$  is odd.* Fix the path  $(1, 2, \dots, k - 1)$  in every solution. We consider 2-vertex paths in the order  $(k, k + 1)$ , then  $(k + 1, k + 2)$  and so on. Thus we obtain  $a_k = a_{k+2} = \dots = a_{n-3} = a_{n-1}$  and  $a_{k+1} = a_{k+3} = \dots = a_{n-2} = a_n$ . Fix the path  $(n - k + 2, \dots, n)$  in the following solutions, and vary the 2-vertex path sequentially starting with  $(1, 2)$ . Here we obtain  $a_1 = a_3 = \dots = a_{k-1} = a_{k+1}$  and  $a_2 = a_4 = \dots = a_{k-2} = a_k$ . Together we have all odd index coefficients to be equal and all even index coefficients to be equal. Consider paths  $(1, 2, \dots, k + 1)$  and  $(2, 3, \dots, k + 2)$  to obtain  $a_1 = a_{k+2}$ .

*Case II:  $n$  is even.* The fixed paths are chosen as in Case I to obtain  $a_1 = a_3 = \dots = a_{n-1}$  and  $a_2 = a_4 = \dots = a_n$ . Considering paths  $(1, 2, \dots, k + 1)$  and  $(2, 3, \dots, k + 2)$  we obtain  $a_1 = a_{k+2}$ .  $\square$

**THEOREM EC.8.** *Let  $G = (V, E)$  be a cycle on  $n = t(k + 1)$  vertices with  $t \geq 2, k \geq 5$  such that  $k + 1$  is even. Then the inequality  $\sum_{i \in V} x_i \leq k + 1$  induces a facet of  $P_k(G)$ .*

**PROOF.** Note that when  $k + 1$  is even, so is  $n$ . The fixed paths are chosen as in Theorem 7 to obtain  $a_1 = a_3 = \dots = a_{n-3} = a_{n-1}$  and  $a_2 = a_4 = \dots = a_{n-2} = a_n$ . In order to connect an odd coefficient to an even coefficient, we require  $k \geq 5$ . Then consider the paths  $(1, 2, 3, 4, 5, \dots, k + 1)$  and  $(1, 2, 3, 5, \dots, k + 2)$  (4 is deleted and  $k + 2$  is added). We obtain  $a_4 = a_{k+2}$ .  $\square$

## Appendix B: Some Remarks on Valid Inequalities

### B.1. Co- $k$ -plex Inequalities for $k \geq 3$ .

Although co- $k$ -plex inequalities form facets of  $P_k(G)$  for  $k = 1, 2$ , they do not in general for  $k \geq 3$ . Consider  $G = (V, \emptyset)$  with at least  $k$  vertices. Note that  $G$  is a co- $k$ -plex and the corresponding inequality  $\sum_{i \in V} x_i \leq r_k$  is not supporting since  $\omega_k(G) = k < r_k$  and there is no  $x \in P_k(G)$  that satisfies it at equality. Hence, these inequalities do not form facets of  $P_k(G)$  for all  $G$ . This is in contrast to the results known for  $k = 1, 2$ . The reason is  $r_k = k$  for  $k = 1, 2$  and every graph  $G$  with at least  $k$  vertices has a  $k$ -plex of size  $r_k = k$ . The next natural question, if they form facets when  $G$  is a co- $k$ -plex with  $\omega_k(G) = r_k$ ,  $k \geq 3$ , is also settled in the negative by the following counterexamples. Assume that  $k$  is even. Construct graph  $G$  of arbitrary order  $n \geq r_k$  as the union of  $n - r_k$  clique components of size one and two clique components of size  $k - 1 = r_k/2$ . Then  $G$  is a co- $k$ -plex with the two “large” clique components forming a  $k$ -plex of size  $r_k$ . Suppose  $F = \{x \in P_k(G) : \sum_{i \in V} x_i = r_k\}$  is a facet of  $P_k(G)$ . Since  $P_k(G)$  is an integral polytope, the extreme points of  $F$  are also integral. Consider one such binary vector  $x^o \in F$ . If  $x_i^o = 1$  for some  $i$  that is a one-vertex clique component of  $G$ , for  $x^o$  to be feasible we have  $\sum_{j \in V \setminus N[i]} x_j^o \leq k - 1$ . Since  $V \setminus N[i] = V \setminus \{i\}$ , we have  $\sum_{i \in V} x_i^o \leq k$ , which contradicts the fact that  $x^o \in F$  as  $r_k > k$ . Hence, the components of extreme points of  $F$  corresponding to one-vertex components of  $G$  are all zeros. Hence, there exists *exactly one extreme point* in  $P_k(G)$  that satisfies  $\sum_{i \in V} x_i \leq r_k$  at equality, which is the incidence vector of  $K_{k-1} \cup K_{k-1}$ . Thus,  $F$  is 0-dimensional and not a facet. For odd  $k$ , we can have arbitrarily large graphs by adding single vertex components to the antiweb  $G_k[V']$  constructed before. By using similar arguments, we can again show that there exists only one point in the  $k$ -plex polytope that satisfies the co- $k$ -plex inequality at equality.

From these observations we can conclude that  $\omega_k(G) = r_k$  is only a necessary condition for the co- $k$ -plex inequality to induce a facet of  $P_k(G)$ . Identifying graph classes for which the co- $k$ -plex inequalities and rank inequalities  $\sum_{i \in J} x_i \leq \omega_k(G[J])$  induce facets of the  $k$ -plex polytope when  $k \geq 3$  is an important problem for future research. It is also a well-known fact that a graph is perfect if and only if its clique polytope is completely characterized by all the maximal independent set inequalities and non-negativity constraints (Cornuéjols 2001). Similarly, we could explore *k-plex perfectness* of graphs whose  $k$ -plex polytope can be completely described by the co- $k$ -plex inequalities described here and the trivial facets. This is also an interesting topic for future research.

### B.2. MIS and Co- $k$ -plex Inequalities.

Both MIS and (maximal) co- $k$ -plex inequalities generalize the MIS inequalities for the clique polytope. For  $k = 1$  they are identical, and for  $k = 2$ , co-2-plex inequalities induce facets and dominate the MIS inequalities as the right-hand side bounds are equal. But based on Theorem 5 and the observation that every lifted MIS inequality has 0 or 1 variable coefficients, every lifted MIS facet of  $P_2(G)$  is a co-2-plex facet. For  $k \geq 3$  however, there could exist facets of  $P_k(G)$  obtained by sequentially lifting an MIS inequality that are different from any inequality co- $k$ -plexes produce. Similarly, although co- $k$ -plex inequalities do not produce facets in general for  $k \geq 3$ , they could provide stronger inequalities compared to MIS in some cases. As a result, for  $k \geq 3$  neither inequality dominates the other in general. Consider the graph  $G_3$  in Figure EC.1 when  $k = 3$ . The vertex set is a co-3-plex and the co-3-plex inequality is  $\sum_{i=1}^7 x_i \leq 5$  (note that we could tighten the RHS bound as  $\omega_3(G_3) = 4$ ). The MIS inequality on the other hand is  $x_1 + x_3 + x_5 + x_7 \leq 3$ , which cuts off the point  $[1, 0, 1, 0, 1, 0, 1]^T$  that is not cut-off by the co-3-plex inequality. Lifting the MIS inequality following the sequence  $(x_2, x_4, x_6)$  yields  $x_1 + x_2 + x_3 + x_5 + x_6 + x_7 \leq 3$ , and following the sequence  $(x_4, x_2, x_6)$  yields  $x_1 + x_3 + x_4 + x_5 + x_7 \leq 3$ . Both are facets, as the variables were maximum lifted. Consider the graph  $G_4$  in Figure EC.1 when  $k = 3$ . The independence number is 3 and the MIS inequalities are implied by variable bounds, while the co-3-plex inequality  $\sum_{i=1}^6 x_i \leq 5$  is not.

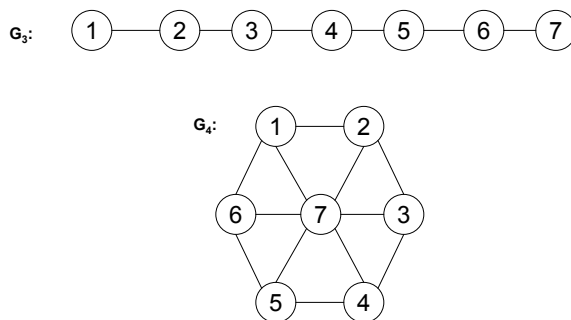

Figure EC.1 Example graphs for comparing MIS and co-3-plex inequalities.

### Appendix C: Numerical Results: Sanchis Graphs

The largest order up to which optimal resolution was possible on Sanchis instances within the 3-hour time limit, using the specified algorithm, for each density is presented in Table EC.1. Note that “< 100” indicates that the smallest instance in our test bed with 100 vertices was not solved optimally. Tables EC.2 and EC.3 present the total running time (excluding read/write time) and number of BC nodes enumerated for solving maximum 1-plex problem on Sanchis graphs using BC(MIS) implementation. Non-optimal termination is indicated by the dagger symbol ( $\dagger$ ). Running times and number of BC nodes enumerated by BC(MIS) for  $k = 2$  is presented in Tables EC.4 and EC.5. The size of the largest 2-plex found and an upper bound on the 2-plex numbers obtained from the BC(MIS) implementation is provided in Table EC.6. Running times and number of BC nodes enumerated by BC(co2plex) for  $k = 2$  is presented in Tables EC.7 and EC.8 up to  $n = 500$  and  $d = 0.6$ . Note that none of the other instances were solved optimally.

Table EC.1 Summary of results on Sanchis instances

| $k$ | Algorithm     | $d = 0.4$ | $d = 0.5$ | $d = 0.6$ | $d = 0.7$ | $d = 0.8$ | $d = 0.9$ |
|-----|---------------|-----------|-----------|-----------|-----------|-----------|-----------|
| 1   | CPLEX default | 800       | 900       | 900       | 900       | 700       | 200       |
| 1   | BC(MIS)       | 1000      | 1000      | 900       | 1000      | 800       | 300       |
| 2   | CPLEX default | 1000      | 600       | 200       | 100       | < 100     | < 100     |
| 2   | BC(MIS)       | 1000      | 900       | 600       | 200       | < 100     | 100       |
| 2   | BC(co2plex)   | 400       | 300       | 200       | < 100     | < 100     | < 100     |

Table EC.2 Running time (secs) of BC(MIS) for  $k = 1$  on Sanchis instances

| $n$  | $d = 0.4$ | $d = 0.5$ | $d = 0.6$    | $d = 0.7$ | $d = 0.8$    | $d = 0.9$    |
|------|-----------|-----------|--------------|-----------|--------------|--------------|
| 100  | 0.203     | 0.422     | 1.812        | 0.797     | 0.328        | 0.14         |
| 200  | 2.172     | 4.109     | 10.734       | 9.86      | 27.047       | 22.171       |
| 300  | 8.891     | 13.922    | 52.625       | 52.484    | 220.422      | 2.219        |
| 400  | 30.235    | 47.766    | 322.235      | 182.266   | 681.5        | <i>TiLim</i> |
| 500  | 69.86     | 90.5      | 807.296      | 322.953   | 1402.66      | <i>TiLim</i> |
| 600  | 169.171   | 226.813   | 2148.77      | 605.219   | 3570.42      | <i>TiLim</i> |
| 700  | 332.813   | 453       | 5594.47      | 1078.2    | 6591.23      | <i>TiLim</i> |
| 800  | 560.125   | 2041.39   | 5623.413252  | 1750.89   | 7028.73      | <i>TiLim</i> |
| 900  | 1057.34   | 1269.95   | 4995.91      | 3358.47   | <i>TiLim</i> | <i>TiLim</i> |
| 1000 | 1894.39   | 2349.67   | <i>TiLim</i> | 4260.28   | <i>TiLim</i> | <i>TiLim</i> |

**Table EC.3** Number of nodes enumerated by BC(MIS) for  $k = 1$  on Sanchis instances

| $n$  | $d = 0.4$ | $d = 0.5$ | $d = 0.6$           | $d = 0.7$ | $d = 0.8$         | $d = 0.9$           |
|------|-----------|-----------|---------------------|-----------|-------------------|---------------------|
| 100  | 29        | 199       | 1126                | 86        | 39                | 4                   |
| 200  | 354       | 1152      | 4022                | 170       | 1440              | 4065                |
| 300  | 511       | 2041      | 13547               | 303       | 3554              | 5                   |
| 400  | 1613      | 5474      | 50350               | 442       | 4794              | 250409 <sup>†</sup> |
| 500  | 1626      | 4910      | 94790               | 373       | 4575              | 104917 <sup>†</sup> |
| 600  | 4199      | 10788     | 183446              | 402       | 6616              | 60535 <sup>†</sup>  |
| 700  | 6979      | 15313     | 314525              | 406       | 7384              | 38725 <sup>†</sup>  |
| 800  | 6774      | 83045     | 423327              | 458       | 5377              | 25228 <sup>†</sup>  |
| 900  | 14221     | 26694     | 158301              | 654       | 5459 <sup>†</sup> | 17790 <sup>†</sup>  |
| 1000 | 21789     | 40319     | 276913 <sup>†</sup> | 570       | 3684 <sup>†</sup> | 11660 <sup>†</sup>  |

**Table EC.4** Running time (secs) of BC(MIS) for  $k = 2$  on Sanchis instances

| $n$  | $d = 0.4$ | $d = 0.5$    | $d = 0.6$    | $d = 0.7$    | $d = 0.8$    | $d = 0.9$    |
|------|-----------|--------------|--------------|--------------|--------------|--------------|
| 100  | 1.266     | 2.562        | 12.203       | 320.125      | <i>TiLim</i> | 18.312       |
| 200  | 10.297    | 17.859       | 61.797       | 4075.13      | <i>TiLim</i> | <i>TiLim</i> |
| 300  | 47.844    | 76.36        | 286.235      | <i>TiLim</i> | <i>TiLim</i> | <i>TiLim</i> |
| 400  | 141.61    | 248.125      | 999.922      | <i>TiLim</i> | <i>TiLim</i> | <i>TiLim</i> |
| 500  | 377.422   | 688.25       | 2495.25      | <i>TiLim</i> | <i>TiLim</i> | <i>TiLim</i> |
| 600  | 820.344   | 1466.3       | 5525.61      | <i>TiLim</i> | <i>TiLim</i> | <i>TiLim</i> |
| 700  | 1610.06   | 2981.74      | <i>TiLim</i> | <i>TiLim</i> | <i>TiLim</i> | <i>TiLim</i> |
| 800  | 3083.42   | 5478.7       | <i>TiLim</i> | <i>TiLim</i> | <i>TiLim</i> | <i>TiLim</i> |
| 900  | 6058.16   | 9204.52      | <i>TiLim</i> | <i>TiLim</i> | <i>TiLim</i> | <i>TiLim</i> |
| 1000 | 9926.52   | <i>TiLim</i> | <i>TiLim</i> | <i>TiLim</i> | <i>TiLim</i> | <i>TiLim</i> |

**Table EC.5** Number of nodes enumerated by BC-MIS for  $k = 2$  on Sanchis instances

| $n$  | $d = 0.4$ | $d = 0.5$          | $d = 0.6$           | $d = 0.7$           | $d = 0.8$            | $d = 0.9$           |
|------|-----------|--------------------|---------------------|---------------------|----------------------|---------------------|
| 100  | 523       | 1467               | 7946                | 169319              | 1851177 <sup>†</sup> | 10850               |
| 200  | 1574      | 4762               | 24859               | 283774              | 753120 <sup>†</sup>  | 699101 <sup>†</sup> |
| 300  | 2910      | 9525               | 59309               | 106882 <sup>†</sup> | 238681 <sup>†</sup>  | 597044 <sup>†</sup> |
| 400  | 3976      | 15987              | 119868              | 38867 <sup>†</sup>  | 81804 <sup>†</sup>   | 242840 <sup>†</sup> |
| 500  | 5249      | 23613              | 174602              | 16181 <sup>†</sup>  | 34463 <sup>†</sup>   | 101949 <sup>†</sup> |
| 600  | 6411      | 29417              | 247807              | 7115 <sup>†</sup>   | 17901 <sup>†</sup>   | 52399 <sup>†</sup>  |
| 700  | 8918      | 41936              | 269150 <sup>†</sup> | 4022 <sup>†</sup>   | 9490 <sup>†</sup>    | 30193 <sup>†</sup>  |
| 800  | 10095     | 45481              | 141117 <sup>†</sup> | 2426 <sup>†</sup>   | 5713 <sup>†</sup>    | 19134 <sup>†</sup>  |
| 900  | 15997     | 50779              | 92591 <sup>†</sup>  | 1622 <sup>†</sup>   | 3693 <sup>†</sup>    | 12578 <sup>†</sup>  |
| 1000 | 19197     | 24291 <sup>†</sup> | 58027 <sup>†</sup>  | 1109 <sup>†</sup>   | 2528 <sup>†</sup>    | 8579 <sup>†</sup>   |

## Acknowledgments

We thank the area/associate editors and the anonymous referees for their comments and suggestions that greatly improved the content and presentation of this paper. Contribution of Sandeep Sachdeva to the proof of Theorem 2 is gratefully acknowledged. We thank Benjamin McClosky for pointing out the simpler proof of Theorem 4, and Hannes Moser for pointing out some typos in the computational results in an earlier version of this manuscript. The research of B. Balasundaram and S. Butenko was partially supported by the US Department of Energy grant DE-SC0002051. The research of S. Butenko was partially supported by AFOSR grant FA9550-09-1-0154 and NSF grant OISE-0553513. The research of I. V. Hicks was partially supported by NSF grant DMI-0521209.

**Table EC.6** 2-plex numbers found by BC(MIS) on Sanchis instances

| $n$  | $d = 0.4$ | $d = 0.5$  | $d = 0.6$  | $d = 0.7$  | $d = 0.8$  | $d = 0.9$  |
|------|-----------|------------|------------|------------|------------|------------|
| 100  | 20        | 20         | 20         | 20         | [24, 25]   | 38         |
| 200  | 40        | 40         | 40         | 40         | [40, 60]   | [50, 75]   |
| 300  | 60        | 60         | 60         | [60, 90]   | [60, 103]  | [59, 116]  |
| 400  | 80        | 80         | 80         | [80, 130]  | [80, 148]  | [76, 159]  |
| 500  | 100       | 100        | 100        | [100, 176] | [100, 191] | [99, 201]  |
| 600  | 120       | 120        | 120        | [120, 222] | [120, 231] | [117, 245] |
| 700  | 140       | 140        | [140, 146] | [140, 266] | [140, 280] | [136, 297] |
| 800  | 160       | 160        | [160, 236] | [160, 306] | [160, 324] | [155, 339] |
| 900  | 180       | 180        | [180, 292] | [180, 349] | [180, 370] | [180, 388] |
| 1000 | 200       | [200, 333] | [200, 352] | [200, 386] | [200, 414] | [196, 440] |

**Table EC.7** Running time (secs) of BC(co2plex) for  $k = 2$  on Sanchis instances

| $n$ | $d = 0.4$    | $d = 0.5$    | $d = 0.6$    |
|-----|--------------|--------------|--------------|
| 100 | 6.781        | 7.985        | 35.5         |
| 200 | 189.797      | 485.625      | 1667.7       |
| 300 | 1658.7       | 4966.11      | <i>TiLim</i> |
| 400 | 9486.86      | <i>TiLim</i> | <i>TiLim</i> |
| 500 | <i>TiLim</i> | <i>TiLim</i> | <i>TiLim</i> |

**Table EC.8** Number of nodes enumerated by BC(co2plex) for  $k = 2$  on Sanchis instances

| $n$ | $d = 0.4$         | $d = 0.5$         | $d = 0.6$          |
|-----|-------------------|-------------------|--------------------|
| 100 | 607               | 1515              | 8445               |
| 200 | 1779              | 5780              | 27896              |
| 300 | 3754              | 12932             | 13899 <sup>†</sup> |
| 400 | 7492              | 3541 <sup>†</sup> | 3490 <sup>†</sup>  |
| 500 | 1109 <sup>†</sup> | 1452 <sup>†</sup> | 762 <sup>†</sup>   |

## References

- Cornuéjols, G. 2001. *Combinatorial Optimization: Packing and Covering*. CBMS-NSF Regional Conference Series in Applied Mathematics, SIAM, Philadelphia.
- Garey, M. R., D. S. Johnson. 1979. *Computers and Intractability: A Guide to the Theory of NP-completeness*. W.H. Freeman and Company, New York.
- Yannakakis, M. 1979. The effect of a connectivity requirement on the complexity of maximum subgraph problems. *Journal of the ACM* **26**(4) 618–630.

Table EC.9 DIMACS benchmarks.

| Graphs           | $ V $ | $ E $  | $d$   | $\omega(G)$ | BC(MIS) (secs) | $\omega_2(G)$ | BC(MIS) (secs) |
|------------------|-------|--------|-------|-------------|----------------|---------------|----------------|
| c-fat200-1.clq   | 200   | 1534   | 0.077 | 12          | 17.1           | 12            | 148.9          |
| c-fat200-2.clq   | 200   | 3235   | 0.163 | 24          | 10.4           | 24            | 19.1           |
| c-fat200-5.clq   | 200   | 8473   | 0.426 | 58          | 2.1            | 58            | 2.1            |
| c-fat500-1.clq   | 500   | 4459   | 0.036 | 14          | 1334.4         | 14            | 1356.1         |
| c-fat500-2.clq   | 500   | 9139   | 0.073 | 26          | 535.7          | 26            | 605.3          |
| c-fat500-5.clq   | 500   | 23191  | 0.186 | 64          | 141.6          | 64            | 141.5          |
| c-fat500-10.clq  | 500   | 46627  | 0.374 | 126         | 39.3           | 126           | 76.5           |
| hamming6-2.clq   | 64    | 1824   | 0.905 | 32          | 0.0            | 32            | 0.0            |
| hamming6-4.clq   | 64    | 704    | 0.349 | 4           | 0.2            | 6             | 0.3            |
| hamming8-2.clq   | 256   | 31616  | 0.969 | 128         | 0.0            | 128           | 189.5          |
| hamming8-4.clq   | 256   | 20864  | 0.639 | 16          | 52.2           | 16            | 8115.2         |
| hamming10-2.clq  | 1024  | 518656 | 0.990 | 512         | 0.8            | [512,530]     | <i>TiLim</i>   |
| hamming10-4.clq  | 1024  | 434176 | 0.829 | [36,234]    | <i>TiLim</i>   | [41,153]      | <i>TiLim</i>   |
| johnson8-2-4.clq | 28    | 210    | 0.556 | 4           | 0.0            | 5             | 0.0            |
| johnson8-4-4.clq | 70    | 1855   | 0.768 | 14          | 0.1            | 14            | 4.4            |
| MANN_a9.clq      | 45    | 918    | 0.927 | 16          | 0.0            | 26            | 0.0            |
| MANN_a27.clq     | 378   | 70551  | 0.990 | 126         | 430.3          | 236           | 79.8           |
| MANN_a45.clq     | 1035  | 533115 | 0.996 | [344,347]   | <i>TiLim</i>   | [662,668]     | <i>TiLim</i>   |
| keller4.clq      | 171   | 9435   | 0.649 | 11          | 129.8          | 15            | 365.4          |
| brock200_1.clq   | 200   | 14834  | 0.745 | [20,31]     | <i>TiLim</i>   | [25,53]       | <i>TiLim</i>   |
| brock200_2.clq   | 200   | 9876   | 0.496 | 12          | 152.5          | [13,24]       | <i>TiLim</i>   |
| brock200_4.clq   | 200   | 13089  | 0.658 | 17          | 6617.5         | [19,41]       | <i>TiLim</i>   |
| brock400_2.clq   | 400   | 59786  | 0.749 | [24,68]     | <i>TiLim</i>   | [27,133]      | <i>TiLim</i>   |
| brock400_4.clq   | 400   | 59765  | 0.749 | [23,69]     | <i>TiLim</i>   | [27,133]      | <i>TiLim</i>   |
| brock800_2.clq   | 800   | 208166 | 0.651 | [19,116]    | <i>TiLim</i>   | [23,253]      | <i>TiLim</i>   |
| brock800_4.clq   | 800   | 207643 | 0.650 | [19,108]    | <i>TiLim</i>   | [23,252]      | <i>TiLim</i>   |
| p_hat300-1.clq   | 300   | 10933  | 0.244 | 8           | 127.0          | [9,66]        | <i>TiLim</i>   |
| p_hat300-2.clq   | 300   | 21928  | 0.489 | [25,51]     | <i>TiLim</i>   | [28,85]       | <i>TiLim</i>   |
| p_hat300-3.clq   | 300   | 33390  | 0.744 | [35,71]     | <i>TiLim</i>   | [43,108]      | <i>TiLim</i>   |
| p_hat700-1.clq   | 700   | 60999  | 0.249 | [11,40]     | <i>TiLim</i>   | [10,291]      | <i>TiLim</i>   |
| p_hat700-2.clq   | 700   | 121728 | 0.498 | [44,208]    | <i>TiLim</i>   | [50,298]      | <i>TiLim</i>   |
| p_hat700-3.clq   | 700   | 183010 | 0.748 | [62,201]    | <i>TiLim</i>   | [73,311]      | <i>TiLim</i>   |

**Table EC.10** Runtime in seconds for Erdős networks using IPBC algorithm.

| $k$ | Graph      | IPBC Time | BC Time | #BC Calls |
|-----|------------|-----------|---------|-----------|
| 1   | ERDOS-97-1 | 1.4       | 0.0     | 5         |
|     | ERDOS-98-1 | 1.4       | 0.1     | 6         |
|     | ERDOS-99-1 | 1.5       | 0.0     | 6         |
|     | ERDOS-97-2 | 367.5     | 0.1     | 7         |
|     | ERDOS-98-2 | 445.4     | 0.0     | 7         |
|     | ERDOS-99-2 | 491.9     | 0.0     | 4         |
| 2   | ERDOS-97-1 | 1.5       | 0.2     | 5         |
|     | ERDOS-98-1 | 1.7       | 0.2     | 6         |
|     | ERDOS-99-1 | 1.8       | 0.3     | 6         |
|     | ERDOS-97-2 | 392.9     | 0.5     | 7         |
|     | ERDOS-98-2 | 464.3     | 0.6     | 7         |
|     | ERDOS-99-2 | 526.5     | 0.4     | 9         |
| 3   | ERDOS-97-1 | 1.8       | 0.4     | 5         |
|     | ERDOS-98-1 | 1.8       | 0.3     | 6         |
|     | ERDOS-99-1 | 1.8       | 0.3     | 6         |
|     | ERDOS-97-2 | 394.1     | 8.7     | 7         |
|     | ERDOS-98-2 | 457.1     | 1.1     | 7         |
|     | ERDOS-99-2 | 520.0     | 3.2     | 9         |
| 4   | ERDOS-97-1 | 2.2       | 1.0     | 4         |
|     | ERDOS-98-1 | 2.8       | 1.5     | 4         |
|     | ERDOS-99-1 | 1.8       | 0.3     | 4         |
|     | ERDOS-97-2 | 424.0     | 39.6    | 3         |
|     | ERDOS-98-2 | 614.7     | 159.8   | 3         |
|     | ERDOS-99-2 | 526.3     | 10.6    | 4         |
| 5   | ERDOS-97-1 | 5.7       | 4.5     | 4         |
|     | ERDOS-98-1 | 7.9       | 6.6     | 4         |
|     | ERDOS-99-1 | 9.9       | 8.5     | 4         |
|     | ERDOS-97-2 | 1042.8    | 688.2   | 3         |
|     | ERDOS-98-2 | 1664.6    | 1244.6  | 3         |
|     | ERDOS-99-2 | 653.5     | 178.1   | 4         |

**Table EC.11** Runtime in seconds for biological networks using IPBC algorithm.

| $k$ | Graph         | IPBC Time | BC Time | #BC Calls |
|-----|---------------|-----------|---------|-----------|
| 1   | H. Pylori     | 11.5      | 0.0     | 13        |
|     | S. Cerevisiae | 44.1      | 0.0     | 0         |
| 2   | H. Pylori     | 12.6      | 1.3     | 2         |
|     | S. Cerevisiae | 46.4      | 0.0     | 0         |
| 3   | H. Pylori     | 37.8      | 26.6    | 2         |
|     | S. Cerevisiae | 45.1      | 0.0     | 1         |
| 4   | H. Pylori     | 29.3      | 18.3    | 2         |
|     | S. Cerevisiae | 45.0      | 0.0     | 1         |
| 5   | H. Pylori     | 133.1     | 123.0   | 3         |
|     | S. Cerevisiae | 41.8      | 0.0     | 3         |

**Table EC.12** Runtime in seconds for computational geometers collaboration networks using IPBC algorithm.

| $k$ | Graph  | IPBC Time | BC Time | #BC Calls |
|-----|--------|-----------|---------|-----------|
| 1   | GEOM-0 | 2287.6    | 0.0     | 0         |
|     | GEOM-1 | 701.2     | 0.0     | 0         |
|     | GEOM-2 | 479.6     | 0.0     | 0         |
| 2   | GEOM-0 | 2384.4    | 0.0     | 0         |
|     | GEOM-1 | 753.2     | 0.1     | 2         |
|     | GEOM-2 | 530.6     | 0.1     | 4         |
| 3   | GEOM-0 | 2387.1    | 0.0     | 0         |
|     | GEOM-1 | 747.7     | 0.1     | 2         |
|     | GEOM-2 | 524.3     | 0.0     | 1         |
| 4   | GEOM-0 | 2383.7    | 0.0     | 0         |
|     | GEOM-1 | 743.7     | 0.4     | 2         |
|     | GEOM-2 | 522.2     | 0.1     | 1         |
| 5   | GEOM-0 | 2298.1    | 0.0     | 0         |
|     | GEOM-1 | 691.6     | 1.8     | 2         |
|     | GEOM-2 | 472.6     | 0.5     | 4         |

**Table EC.13** Runtime in seconds for the Reuters terror news networks using IPBC algorithm.

| $k$ | Graph  | IPBC Time | BC Time | #BC Calls |
|-----|--------|-----------|---------|-----------|
| 1   | DAYS-3 | 3110.8    | 0.1     | 3         |
|     | DAYS-4 | 2940.8    | 0.2     | 1         |
|     | DAYS-5 | 2758.0    | 0.0     | 0         |
| 2   | DAYS-3 | 3367.8    | 4.1     | 1         |
|     | DAYS-4 | 2635.7    | 0.3     | 1         |
|     | DAYS-5 | 2462.9    | 0.1     | 2         |
| 3   | DAYS-3 | 3395.4    | 45.5    | 1         |
|     | DAYS-4 | 2625.1    | 4.7     | 1         |
|     | DAYS-5 | 2445.5    | 0.2     | 2         |
| 4   | DAYS-3 | 3489.8    | 203.0   | 1         |
|     | DAYS-4 | 2642.3    | 51.4    | 1         |
|     | DAYS-5 | 2426.3    | 2.7     | 1         |
| 5   | DAYS-3 | 15336.9   | 12329.1 | 1         |
|     | DAYS-4 | 6201.4    | 3316.8  | 1         |
|     | DAYS-5 | 2820.8    | 113.1   | 1         |
